# Supplementary material for: Relationships between kinetic constants and the amino acid composition of enzymes from the yeast Saccharomyces cerevisiae glycolysis pathway
Source: PubMed Central journal article supplement (PMC3494524; doi:10.1186/1687-4153-2012-11), 2012-08-06
Supplement: 1687-4153-2012-11-S1.pdf [file 1687-4153-2012-11-S1.pdf]

**Additional file 1**Kinetic constants and enzyme amino acid sequences of the yeast *Saccharomyces cerevisiae*

| Enzyme (Substrate)                                                                          | UniProtKB accession number <sup>a</sup> | Kinetic constants <sup>b</sup>     |                         |                                                          |
|---------------------------------------------------------------------------------------------|-----------------------------------------|------------------------------------|-------------------------|----------------------------------------------------------|
|                                                                                             |                                         | $k_{cat}$<br>s <sup>-1</sup>       | $K_M$<br>mM             | $K_{sp}=k_{cat}/K_M$<br>s <sup>-1</sup> mM <sup>-1</sup> |
| Hexokinase<br>EC 2.7.1.1 HXK (D-glucose)                                                    | P04806                                  | 1.06                               | 0.120                   | 8.333                                                    |
| Glyceraldehyde-3-phosphate dehydrogenase<br>EC 1.2.1.12 GADH (D-glyceraldehyde 3-phosphate) | P00360                                  | 16.70                              | 0.600                   | 27.833                                                   |
| Phosphoglycerate kinase<br>EC 2.7.2.3 PGK (3-phospho-D-glycerate)                           | P00560                                  | 354.00                             | 0.770<br>1.280          | 459.740<br>276.563                                       |
| Phosphoglycerate mutase<br>EC 5.4.2.1 PGM (3-phosphoglycerate)                              | P00950                                  | 384.00<br>490.00                   | 0.650<br>0.740          | 590.769<br>662.162                                       |
| Enolase<br>EC 4.2.1.11 ENO (2-phospho-D-glycerate)                                          | P00924                                  | 78.00<br>230.00                    | 0.043<br>0.050          | 1813.950<br>4600.000                                     |
| Pyruvate kinase<br>EC 2.7.1.40 PK (phosphoenolpyruvate)                                     | P00549                                  | 58.40<br>66.00<br>226.00<br>232.00 | 0.021<br>0.045          | 3142.850<br>5022.220                                     |
| Pyruvate decarboxylase<br>EC 4.1.1.1 PDC (pyruvate)                                         | P06169                                  | 2.10<br>10.00                      | 2.290                   | 0.917<br>1.562                                           |
| Triosephosphate isomerase<br>EC 5.3.1.1 TIM (D-glyceraldehyde 3-phosphate)                  | P00942                                  | 4700.00<br>6400.00<br>6900.00      | 1.100<br>1.130<br>1.400 | 4571.429<br>4928.571<br>5663.717                         |
| Pyruvate carboxylase<br>EC 6.4.1.1 PYC (pyruvate)                                           | P11154                                  | 60.00                              | 0.495                   | 121.212                                                  |

a Protein knowledge base UniProtKB/Swiss Prot [15] accession numbers URL: <http://www.uniprot.org>

b Comprehensive Enzyme Information system BRENDA [14] URL: <http://www.brenda-enzymes.org>
