# Supplementary material for: Relationships between kinetic constants and the amino acid composition of enzymes from the yeast Saccharomyces cerevisiae glycolysis pathway
Source: PubMed Central journal article supplement (PMC3494524; doi:10.1186/1687-4153-2012-11), 2012-08-06
Supplement: 1687-4153-2012-11-S2.pdf [file 1687-4153-2012-11-S2.pdf]

**Additional file 2**

The variance analysis of the regression models. Multiple linear regression models<sup>a</sup> linking the log-values of kinetic constants and the amino acid composition of the yeast *Saccharomyces cerevisiae* enzyme sequences

| Model | Variables            |                  | Variance source | Sum of squares | Df | Mean square | F-ratio | <i>p</i> -value |
|-------|----------------------|------------------|-----------------|----------------|----|-------------|---------|-----------------|
|       | dependent            | independent      |                 |                |    |             |         |                 |
| I     | log( $k_{cat}$ )     | M, W, R, L       | model           | 18.3210        | 4  | 4.58024     | 64.86   | 0.0000          |
|       |                      |                  | <i>residual</i> | 0.8473         | 12 | 0.07061     |         |                 |
|       |                      |                  | total           | 19.1683        | 16 |             |         |                 |
| II    | log( $k_{cat}$ )     | T, V, H, A, K    | model           | 18.2526        | 5  | 3.65052     | 43.85   | 0.0000          |
|       |                      |                  | <i>residual</i> | 0.9157         | 11 | 0.08325     |         |                 |
|       |                      |                  | total           | 19.1683        | 16 |             |         |                 |
| III   | log( $k_{cat}$ )     | A, H, V, E       | model           | 17.1176        | 4  | 4.27939     | 24.50   | 0.0000          |
|       |                      |                  | <i>residual</i> | 2.0507         | 12 | 0.17090     |         |                 |
|       |                      |                  | total           | 19.1683        | 16 |             |         |                 |
| IV    | log( $K_M$ )         | D, N, W, L, A    | model           | 6.1371         | 5  | 1.22741     | 82.97   | 0.0000          |
|       |                      |                  | <i>residual</i> | 0.1331         | 9  | 0.01479     |         |                 |
|       |                      |                  | total           | 6.2702         | 14 |             |         |                 |
| V     | log( $k_{cat}/K_M$ ) | A, H, R, G, Q, N | model           | 21.9479        | 6  | 3.65800     | 65.91   | 0.0000          |
|       |                      |                  | <i>residual</i> | 0.4995         | 9  | 0.05550     |         |                 |
|       |                      |                  | total           | 22.4474        | 15 |             |         |                 |
| VI    | log( $k_{cat}/K_M$ ) | L, T, N, W, Q, F | model           | 21.9286        | 6  | 3.65480     | 63.40   | 0.0000          |
|       |                      |                  | <i>residual</i> | 0.5188         | 9  | 0.05764     |         |                 |
|       |                      |                  | total           | 22.4474        | 15 |             |         |                 |
| VII   | log( $k_{cat}/K_M$ ) | T, Q, C, N, A    | model           | 21.7742        | 5  | 4.35480     | 64.69   | 0.0000          |
|       |                      |                  | <i>residual</i> | 0.6732         | 10 | 0.06732     |         |                 |
|       |                      |                  | total           | 22.4474        | 15 |             |         |                 |

a Model elements together with the statistical indices are represented in Table 1
