# Supplementary material for: Relationships between kinetic constants and the amino acid composition of enzymes from the yeast Saccharomyces cerevisiae glycolysis pathway
Source: PubMed Central journal article supplement (PMC3494524; doi:10.1186/1687-4153-2012-11), 2012-08-06

### Additional file 5

The linkage of kinetic constants and amino acid composition for glycolytic enzymes employed in the Teusink's model.

Relationship between the amino acid composition and  $K_M$  values for 10 enzymes (HXK, GPI, ALD, GAPDH, GlycPDH, PGK, PGM, ENOL, PK, PDC) employed in the Teusink's model [26] for yeast glycolysis. The plot of actual  $K_M$  values (A) versus those predicted by the linear regression equation:  $\log(K_M) = 5.1877 - 0.84811 * K - 0.73666 * C + 0.46523 * Y - 0.40875 * M + 0.13872 * P$  ( $R^2_{adj.} = 98.87\%$ ,  $p = 0.0000$ ). Relationship between an increase in the percentage of explained variance and the number of independent variables (amino acid frequencies of occurrence) included in multiple regressions (B), where: 1 – K, 2 – K, Y, 3 – K, Y, C, 4 – K, Y, C, M, and 5 – K, Y, C, M, I.

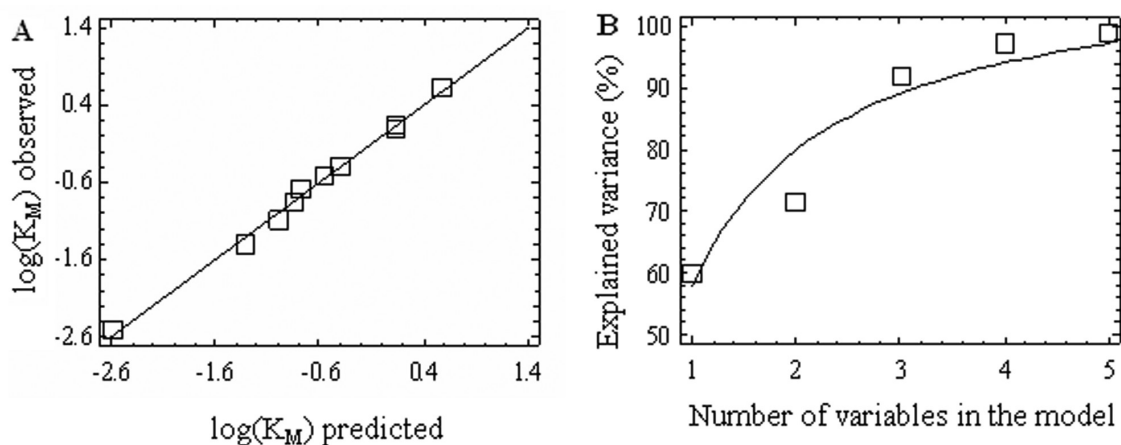

Supplement: 1687-4153-2012-11-S5.pdf [file 1687-4153-2012-11-S5.pdf]
