# Supplementary material for: Relationships between kinetic constants and the amino acid composition of enzymes from the yeast Saccharomyces cerevisiae glycolysis pathway
Source: PubMed Central journal article supplement (PMC3494524; doi:10.1186/1687-4153-2012-11), 2012-08-06

### Additional file 6

The 2<sup>nd</sup> order multiple relationships of kinetic constants and amino acid composition. The 2<sup>nd</sup> order multiple regressions showing changes of the log-values of kinetic constants as dependent variables upon the frequencies of occurrence for two amino acids in the yeast *Saccharomyces cerevisiae* enzyme sequences, where  $k_{cat}$  is the catalytic constant (A),  $K_M$  is the Michaelis-Menten constant (C), and  $k_{cat}/K_M$  is the specificity constant  $k_{sp}$  (E). The observed versus predicted plots (B,D,F) for the values of dependent variables ( $k_{cat}$ ,  $K_M$ , and  $k_{cat}/K_M$ , respectively). The predicted values were calculated from the regression equations:  $\log(k_{cat}) = 2.292 + 2.644*W - 0.584*W^2 - 1.634*M*W$  ( $R^2_{adj.} = 92.36\%$ ,  $p = 0.0000$ );  $\log(K_M) = -15.938 + 10.145*N - 1.035*N^2 - 0.311*D*N$  ( $R^2_{adj.} = 79.40\%$ ,  $p = 0.0001$ );  $\log(k_{sp}) = 5.847 - 4.251*H + 0.247*A*H$  ( $R^2_{adj.} = 51.71\%$ ,  $p = 0.0035$ ).

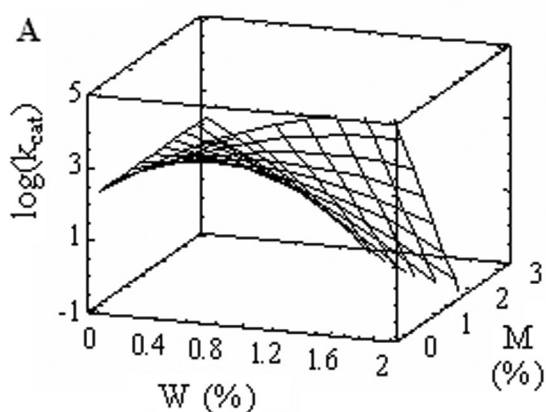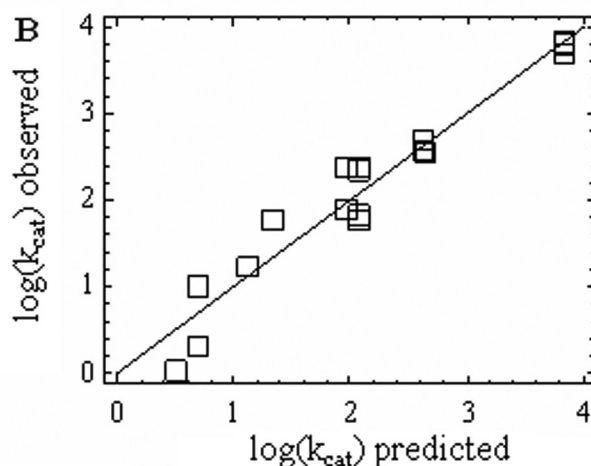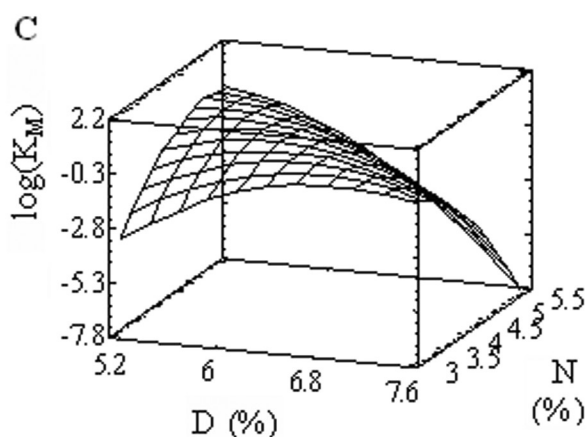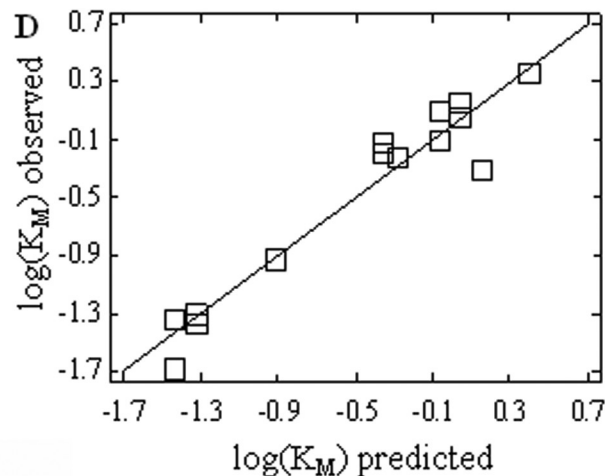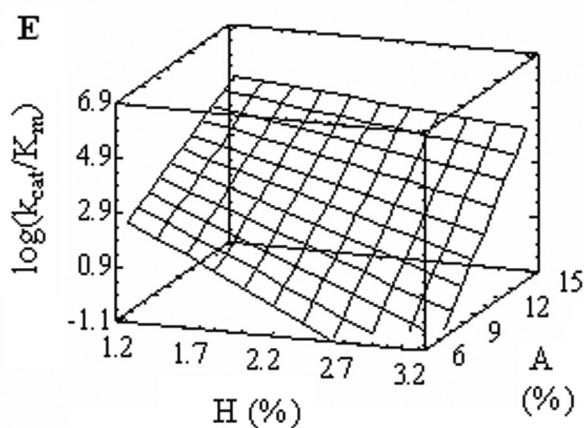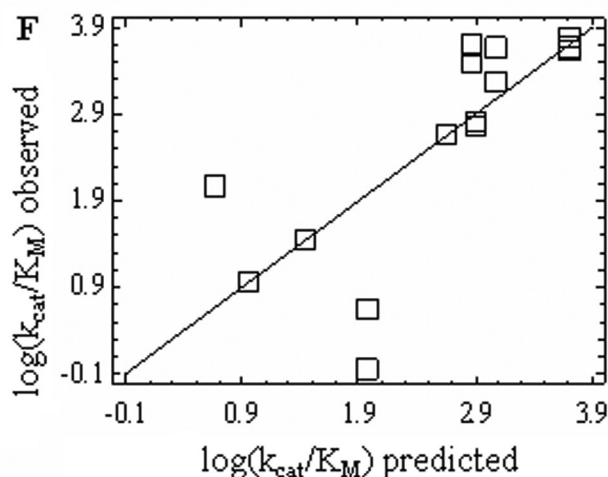

Supplement: 1687-4153-2012-11-S6.pdf [file 1687-4153-2012-11-S6.pdf]
